# Supplementary material for: Dupuytren's disease metabolite analyses reveals alterations following initial short-term fibroblast culturing
Source: Royal Society of Chemistry journal article supplement (doi:10.1039/c2mb25173f), 2012-06-26

## Supplemental Information

**Supplemental Table S1** Demographic details from Dupuytren and Carpal Tunnel cases.

| Patient No. | Patient Group | Technique                                              | Patient ID | Age  | Gender | Ethnic Background    | Anatomical Tissue Location     |
|-------------|---------------|--------------------------------------------------------|------------|------|--------|----------------------|--------------------------------|
| 1           | Cohort A      | Metabolic Fingerprint Analysis with FT-IR Experiment 1 | DD8        | 77   | Male   | White                | Nodule, Cord, Fascia           |
| 2           |               |                                                        | DD9        | 58   | Male   | White                | Nodule, Cord, Fascia, Fat, SON |
| 3           |               |                                                        | DD10       | 76   | Male   | White                | Nodule, Cord, Fascia           |
| 4           |               |                                                        | DD11       | 67   | Male   | White                | Nodule, Cord, Fascia, Fat, SON |
| 5           |               |                                                        | DD12       | 52   | Male   | White                | Nodule, Cord, Fascia, Fat, SON |
| 6           |               |                                                        | DD13       | 74   | Female | White                | Nodule, Cord, Fascia, Fat, SON |
| 7           | Cohort B      |                                                        | DD2        | 71   | Male   | White                | Nodule, Cord, Fascia, Fat, SON |
| 8           |               |                                                        | DD17       | 67   | Male   | White                | Cord, Fascia                   |
| 9           |               |                                                        | DD18       | 68   | Male   | White                | Nodule, Cord                   |
| 10          |               |                                                        | CT5        | 78   | Male   | White                | Fascia                         |
| 11          |               |                                                        | CT6        | 62   | Female | White                | Fascia                         |
| 12          |               |                                                        | CT7        | 50   | Female | White                | Fascia                         |
| 13          | Cohort C      |                                                        | CT8        | 28   | Male   | White                | Fascia                         |
| 14          |               | DD44                                                   | 64         | Male | White  | Nodule, Cord, Fascia |                                |
| 15          |               | DD60                                                   | 67         | Male | White  | Nodule, Cord, Fascia |                                |
| 16          |               | DD61                                                   | 77         | Male | White  | Nodule, Cord, Fascia |                                |

**Supplemental Table S2** List of categories and the sample set chosen for chemometric analyses of FT-IR and GC-MS data.

| Experiment                   | Patient Cohort | Sample set                          |
|------------------------------|----------------|-------------------------------------|
| 1.1 Metabolic Fingerprinting | A,B            | DD N,C, <b>F</b>                    |
| 1.2 Metabolic Fingerprinting | B              | DD N,C, <b>F</b> & CT F*            |
| 1.3 Metabolic Fingerprinting | A,B            | DD N,C, <b>F</b> ,T,S               |
| 1.4 Metabolic Fingerprinting | A,B            | DD N,C, <b>F</b> ,T,S (Passage 0-6) |
| 1.5 Metabolic Footprinting   | A              | DD N,C, <b>F</b>                    |
| 2 Metabolic Profiling        | C              | DD N,C, <b>F</b>                    |

\*external control, N=Nodule, C=Cord, **F**=Fascia (internal control), T=Fat, S=Skin overlying nodule

### Supplemental Table S3

Table S3 List of 69 known detected metabolite features (peaks) and their involvement in corresponding pathways. 'Yes' to Definitive ID = the metabolite in the sample has matched (by retention index and mass spectrum) to an authentic chemical standard present in MMD's EI-MS mass spectral library. 'No' = the mass spectrum only matches to a metabolite in other mass spectral libraries (i.e. not the Manchester library). Definitive ID = Due to the nature of the analysis, not all metabolites detected can be accurately identified and some have similar chemical structure and were assigned by best possible match score.

| Metabolite No | HMDB Accession ID | Metabolite Identification                  | Definitive | Pathway                              |
|---------------|-------------------|--------------------------------------------|------------|--------------------------------------|
| 1             |                   | trimethylamine-N-oxide                     | no         | Amino Acid Metabolism                |
| 2             | HMDB00883         | valine                                     | yes        |                                      |
| 3             | HMDB00192         | cystine                                    | yes        |                                      |
| 4             | HMDB00929         | tryptophan                                 | yes        |                                      |
| 5             | HMDB00687         | leucine                                    | yes        |                                      |
| 6             | HMDB00050         | adenosine                                  | yes        |                                      |
| 7             | HMDB00172         | isoleucine                                 | yes        |                                      |
| 8             | HMDB00687         | leucine                                    | yes        |                                      |
| 9             | HMDB00172         | isoleucine                                 | yes        |                                      |
| 10            | HMDB00123         | glycine                                    | yes        |                                      |
| 11            | HMDB00162         | proline                                    | yes        |                                      |
| 12            | HMDB00187         | serine                                     | yes        |                                      |
| 13            | HMDB00161         | alanine                                    | yes        |                                      |
| 14            | HMDB00167         | threonine                                  | yes        |                                      |
| 15            | HMDB00191         | aspartic acid                              | yes        |                                      |
| 16            | HMDB00191         | aspartic acid                              | yes        |                                      |
| 17            | HMDB00574         | cysteine                                   | yes        |                                      |
| 18            | HMDB00696         | methionine                                 | yes        |                                      |
| 19            | HMDB00574         | cysteine                                   | yes        |                                      |
| 20            | HMDB00696         | methionine                                 | yes        |                                      |
| 21            | HMDB00159         | phenylalanine                              | yes        |                                      |
| 22            | HMDB00159         | phenylalanine                              | yes        |                                      |
| 23            | HMDB00159         | phenylalanine                              | yes        |                                      |
| 24            | HMDB00123         | glycine                                    | yes        |                                      |
| 25            | HMDB00182         | lysine                                     | yes        |                                      |
| 26            | HMDB00182         | lysine                                     | yes        |                                      |
| 27            | HMDB00182         | lysine                                     | yes        |                                      |
| 28            | HMDB11733         | glycylglycine                              | no         |                                      |
| 29            | HMDB00158         | tyrosine                                   | yes        |                                      |
| 30            | HMDB00158         | tyrosine                                   | yes        |                                      |
| 31            | HMDB00883         | valine                                     | yes        |                                      |
| 32            | HMDB00167         | threonine                                  | yes        |                                      |
| 33            | HMDB00191         | aspartic acid                              | yes        |                                      |
| 34            | HMDB00143         | galactose                                  | yes        | Carbohydrate Metabolism              |
| 35            |                   | sugar                                      | no         |                                      |
| 36            |                   | inositol                                   | no         |                                      |
| 37            |                   | sugar                                      | no         |                                      |
| 38            |                   | sugar                                      | no         |                                      |
| 39            |                   | sugar                                      | no         |                                      |
| 40            |                   | sugar                                      | no         |                                      |
| 41            |                   | sugar                                      | no         |                                      |
| 42            |                   | sugar                                      | no         |                                      |
| 43            |                   | sugar                                      | no         | Fatty Acid Metabolism                |
| 43            | HMDB00827         | octadecanoic acid                          | yes        |                                      |
| 44            | HMDB10368         | cholesterol                                | yes        |                                      |
| 45            | HMDB00482         | octanoic acid                              | yes        | Glycerolipid Metabolism              |
| 46            | HMDB00220         | hexadecanoic acid                          | yes        |                                      |
| 47            | HMDB00131         | glycerol                                   | yes        | Glycolysis pathway                   |
| 48            | HMDB00131         | glycerol                                   | yes        |                                      |
| 50            | HMDB00126         | glycerol-3-phosphate                       | yes        |                                      |
| 51            | HMDB01401         | glucose-6-phosphate                        | yes        | Metabolism of Cofactors and Vitamins |
| 52            | HMDB01401         | glucose-6-phosphate                        | yes        |                                      |
| 53            | HMDB02730         | nicotinamide                               | yes        |                                      |
| 54            | HMDB00210         | Pantothenic acid                           | yes        | Metabolism of Other Amino Acids      |
| 55            |                   | 3-ureidopropionic acid and/or beta-alanine | no         |                                      |
| 56            | HMDB00641         | glutamine                                  | yes        |                                      |
| 57            | HMDB00641         | glutamine                                  | yes        |                                      |
| 58            | HMDB00641         | glutamine                                  | yes        |                                      |
| 59            | HMDB00300         | uracil                                     | yes        | Starch and sucrose metabolism        |
| 60            | HMDB00300         | uracil                                     | yes        |                                      |
| 61            |                   | sucrose                                    | no         | Tricarboxylic acid cycle             |
| 62            |                   | sucrose                                    | no         |                                      |
| 63            | HMDB00254         | succinic acid                              | yes        |                                      |
| 64            | HMDB00094         | citric acid                                | yes        | Urea cycle                           |
| 65            | HMDB00243         | pyruvic acid                               | yes        |                                      |
| 66            |                   | thiourea                                   | no         |                                      |
| 67            |                   | thiourea                                   | no         | Uronic acid pathway                  |
| 68            |                   | thiourea                                   | no         |                                      |
| 69            |                   | à-D-Galactopyranosiduronic acid            | no         |                                      |

## Figure Legends

**Supplemental Figure S1A** The five sites from the diseased hand. The Dupuytren's disease-associated tissues that are subjected to analysis in this study. Five different Dupuytren's disease-associated tissues in each patient's hand are collected, the normal fascia (unaffected transverse fascia), palmar nodule and cord, skin overlying nodule, and fat. **Supplemental Figure S1B** The palm of an unaffected individual used as control. The palm of the hand of a control subject, where the overlying skin has been removed to demonstrate the position of the palmar fascia harvested. Skin, palmar fascia (transverse carpal ligament) and fat were obtained from control subjects, individuals undergoing carpal tunnel release.

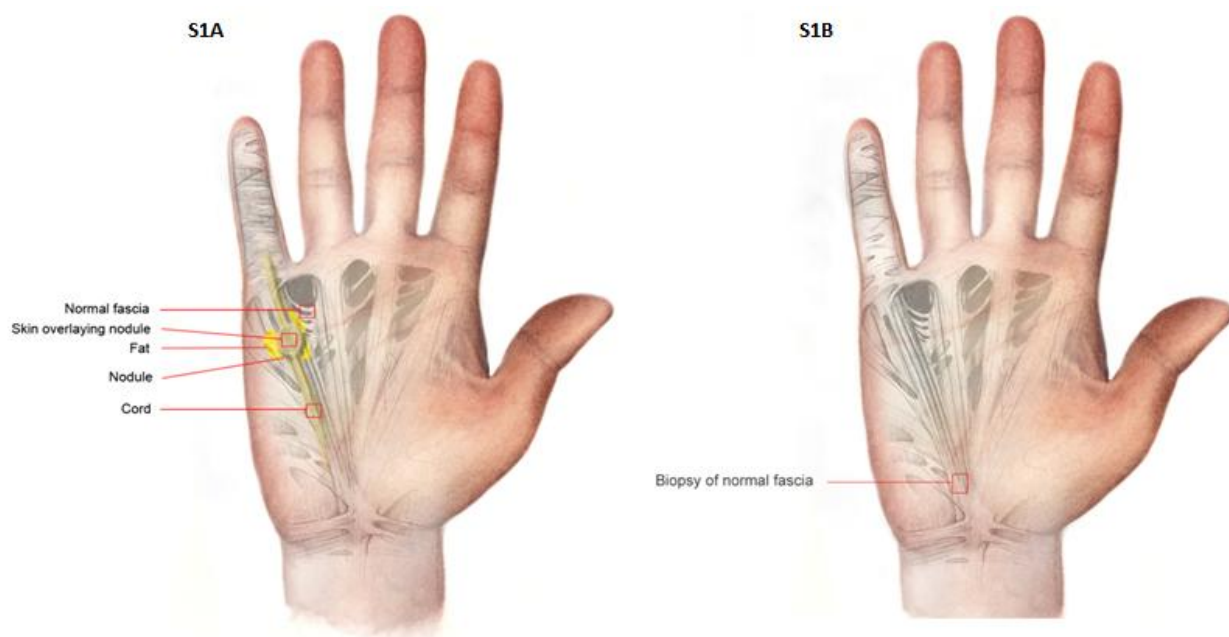

**Supplemental Figure S2** Hematoxylin and eosin slides displaying cross sections from disease and control tissues.

**S 2**

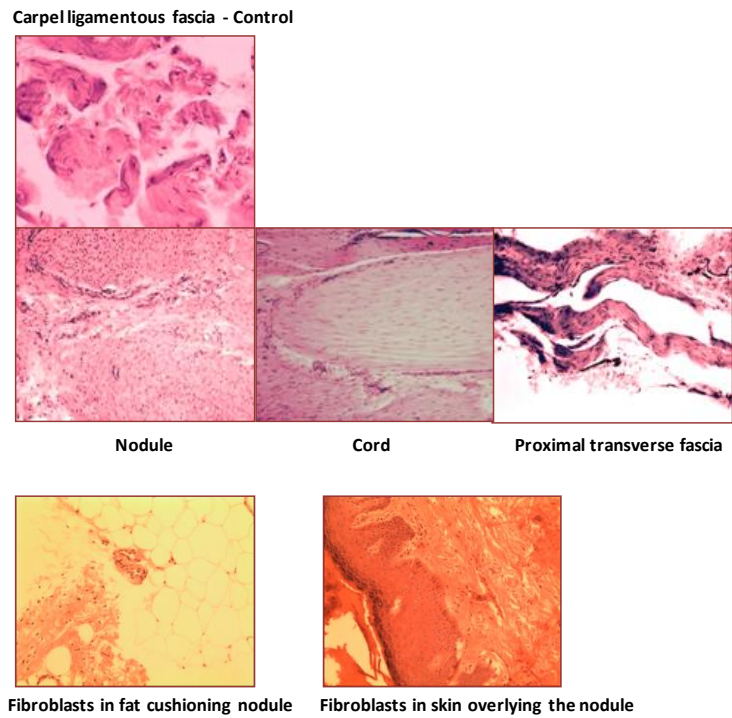

**Supplemental Figure S3** A workflow representing the procedure implemented to analyse the samples from Dupuytren’s disease and control fibroblast cell cultures.

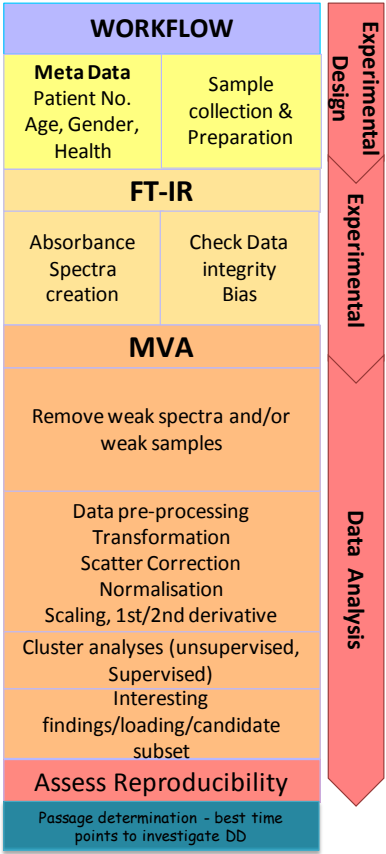

**Supplemental Figure S4** Flowchart of metabolomics experiment – from experimental design through to data analysis.

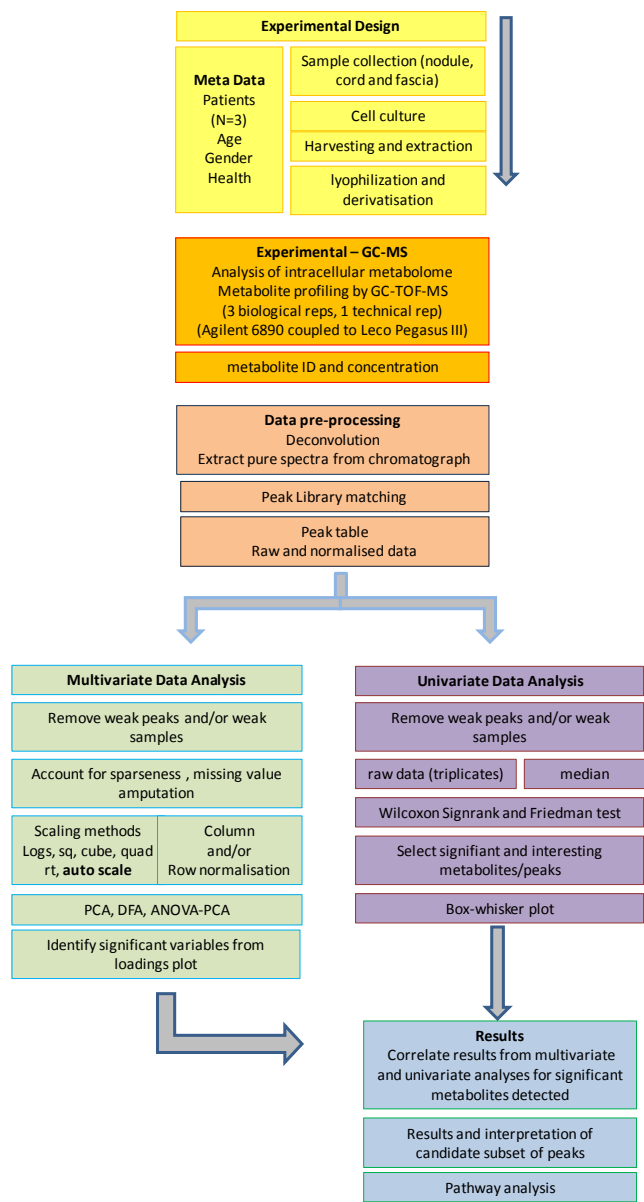

**Supplemental Figure S5** Mass spectrometry spectra of metabolites features reported in Figures 8A-F.

8 a) L-Leucine MW 131.173

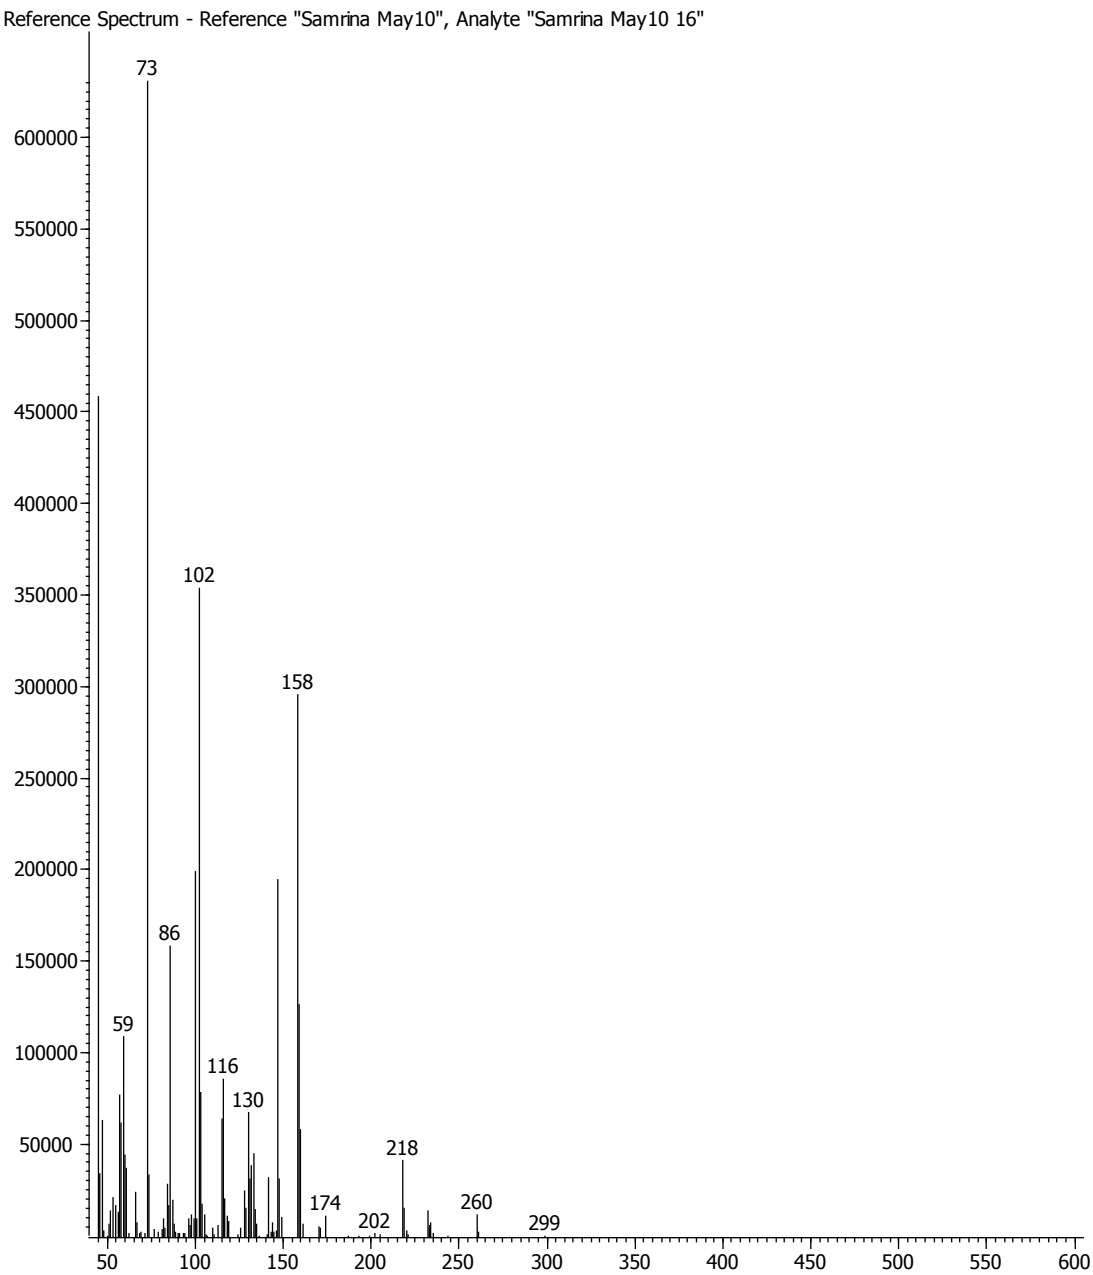

Supplement: c2mb25173f.pdf [file c2mb25173f.pdf]
