# Supplementary material for: Dupuytren's disease metabolite analyses reveals alterations following initial short-term fibroblast culturing
Source: Royal Society of Chemistry journal article supplement (doi:10.1039/c2mb25173f), 2012-06-26

### 8 a) L-Leucine MW 131.173

Reference Spectrum - Reference "Samrina May10", Analyte "Samrina May10 16"

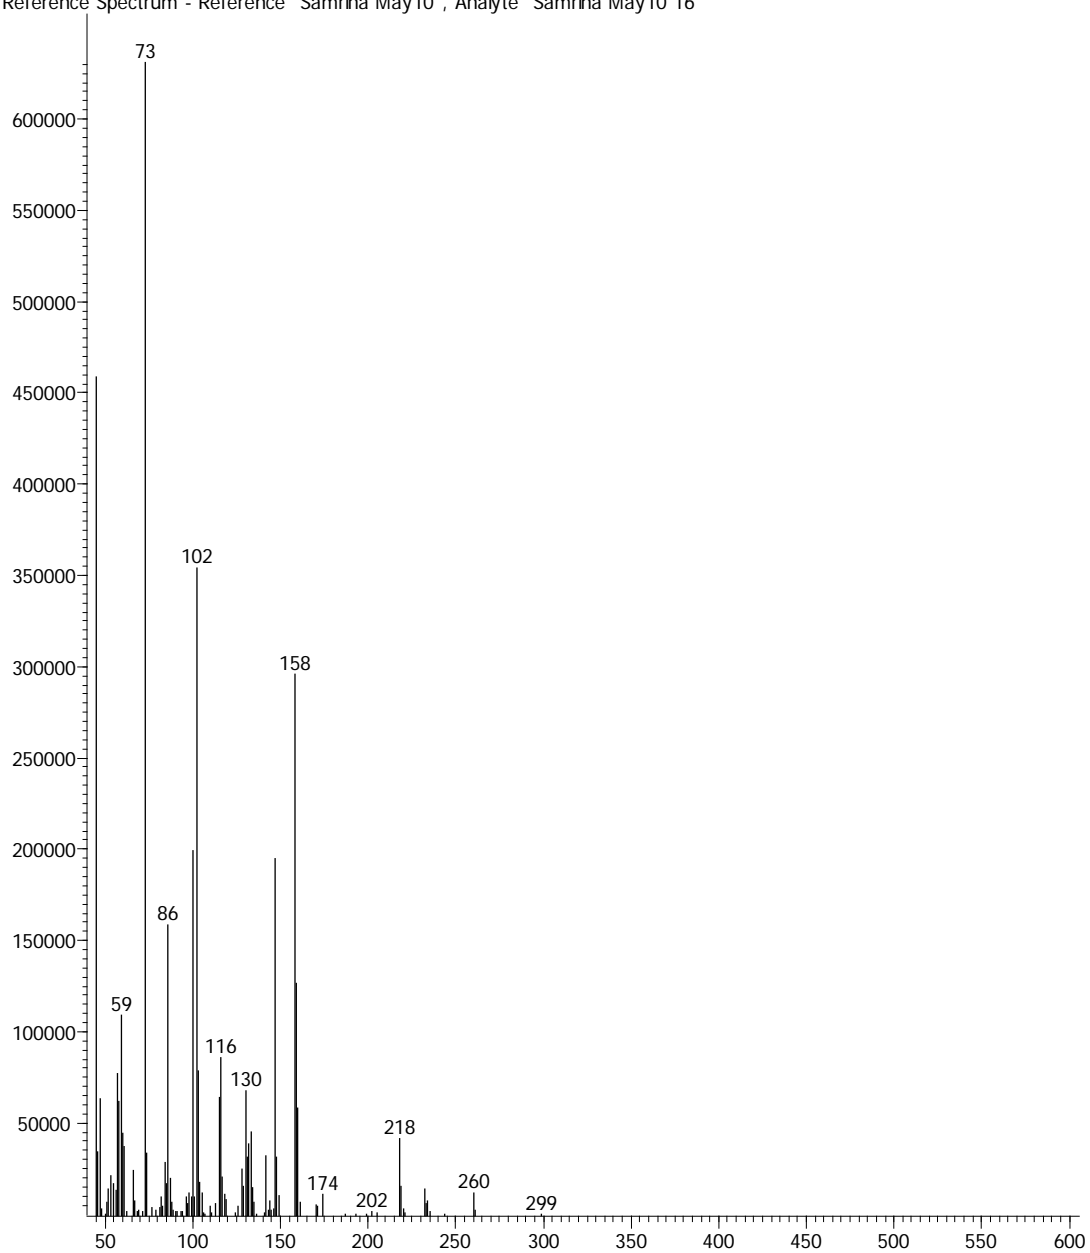

### 8 b) Pantothenic acid MW 219.235

Reference Spectrum - Reference "Samrina May10", Analyte "Samrina May10 75"

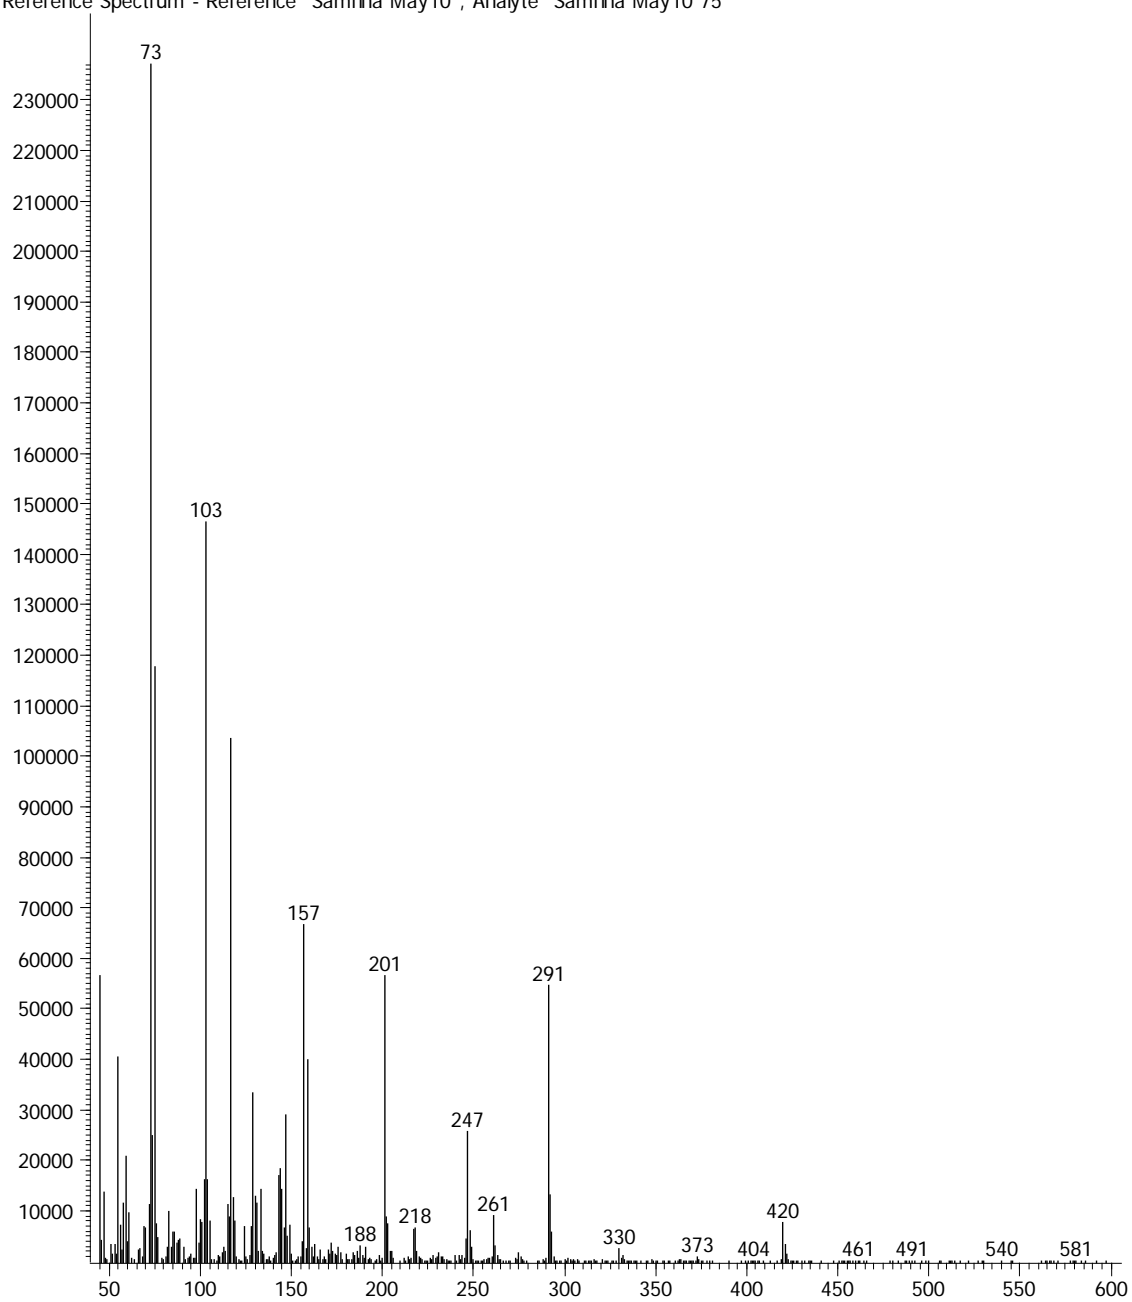

### 8 c) L-Phenylalanine MW 165.189

Reference Spectrum - Reference "Samrina May10", Analyte "Samrina May10 58"

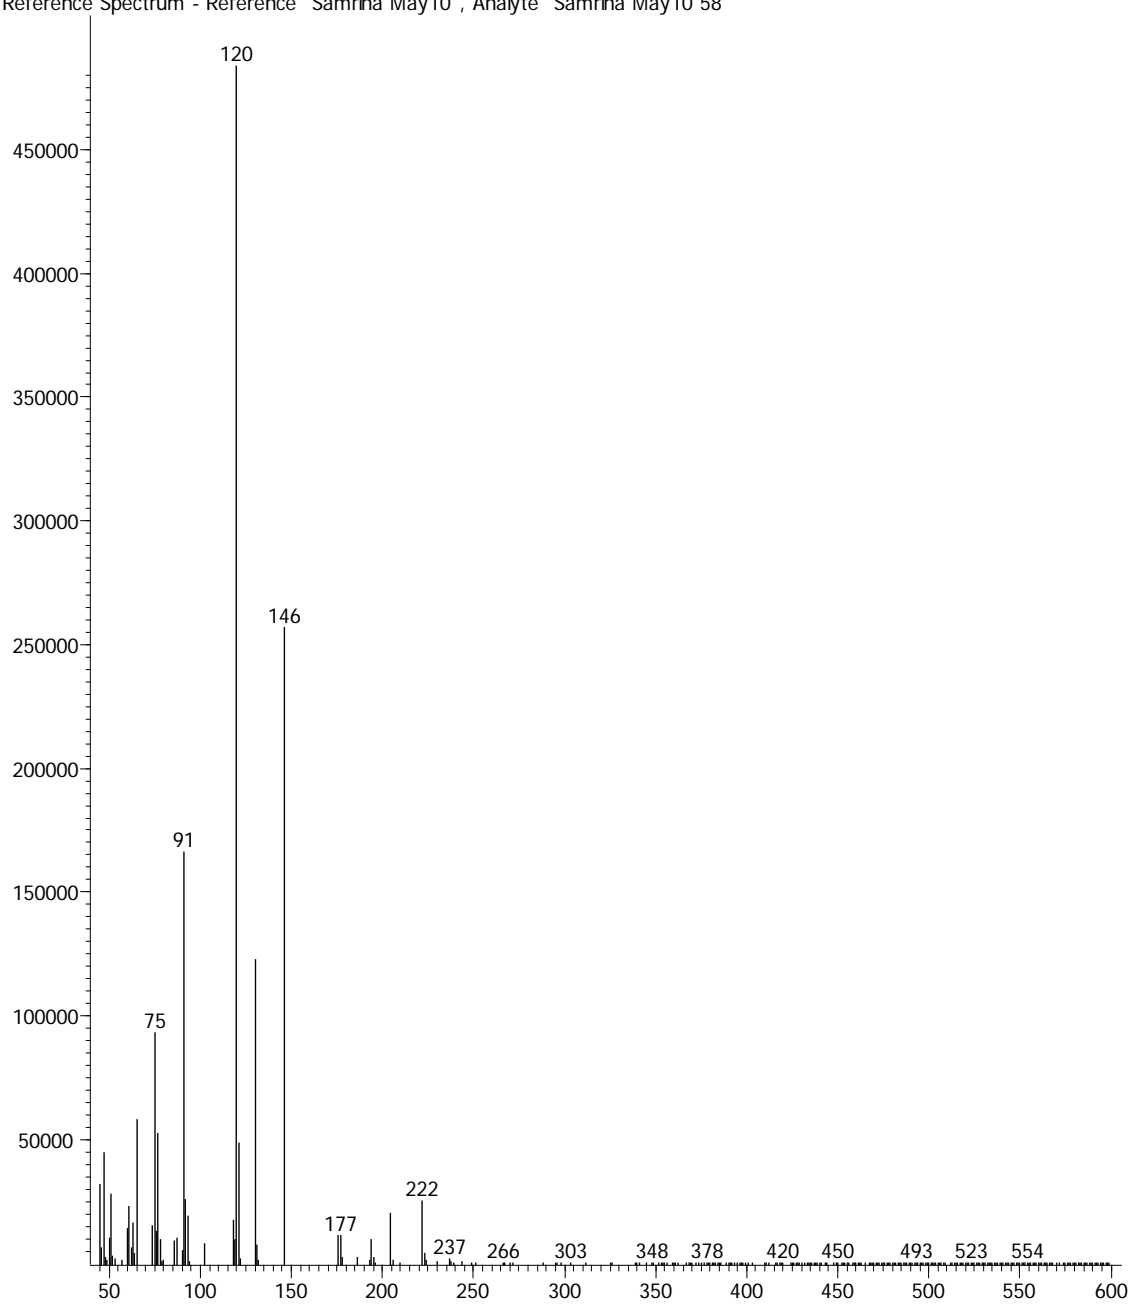

### 8 d) L-Lysine MW 146.18

Reference Spectrum - Reference "Samrina May10", Analyte "Samrina May10 60"

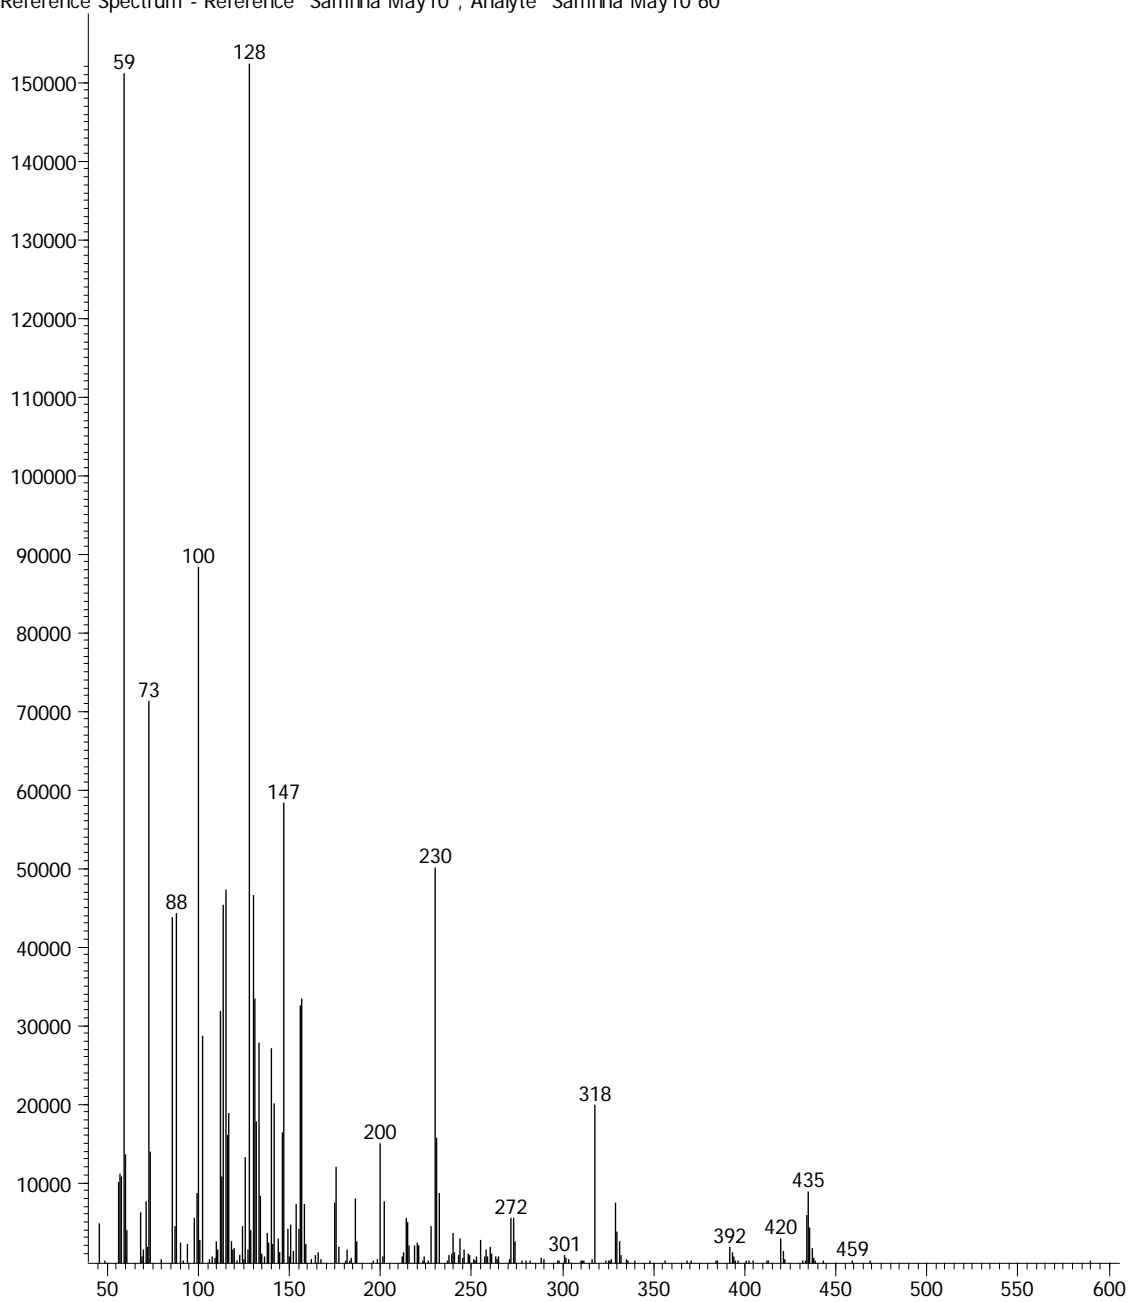

### 8 e) L-Aspartic acid MW 133.10

Reference Spectrum - Reference "Samrina May10", Analyte "Samrina May10 39"

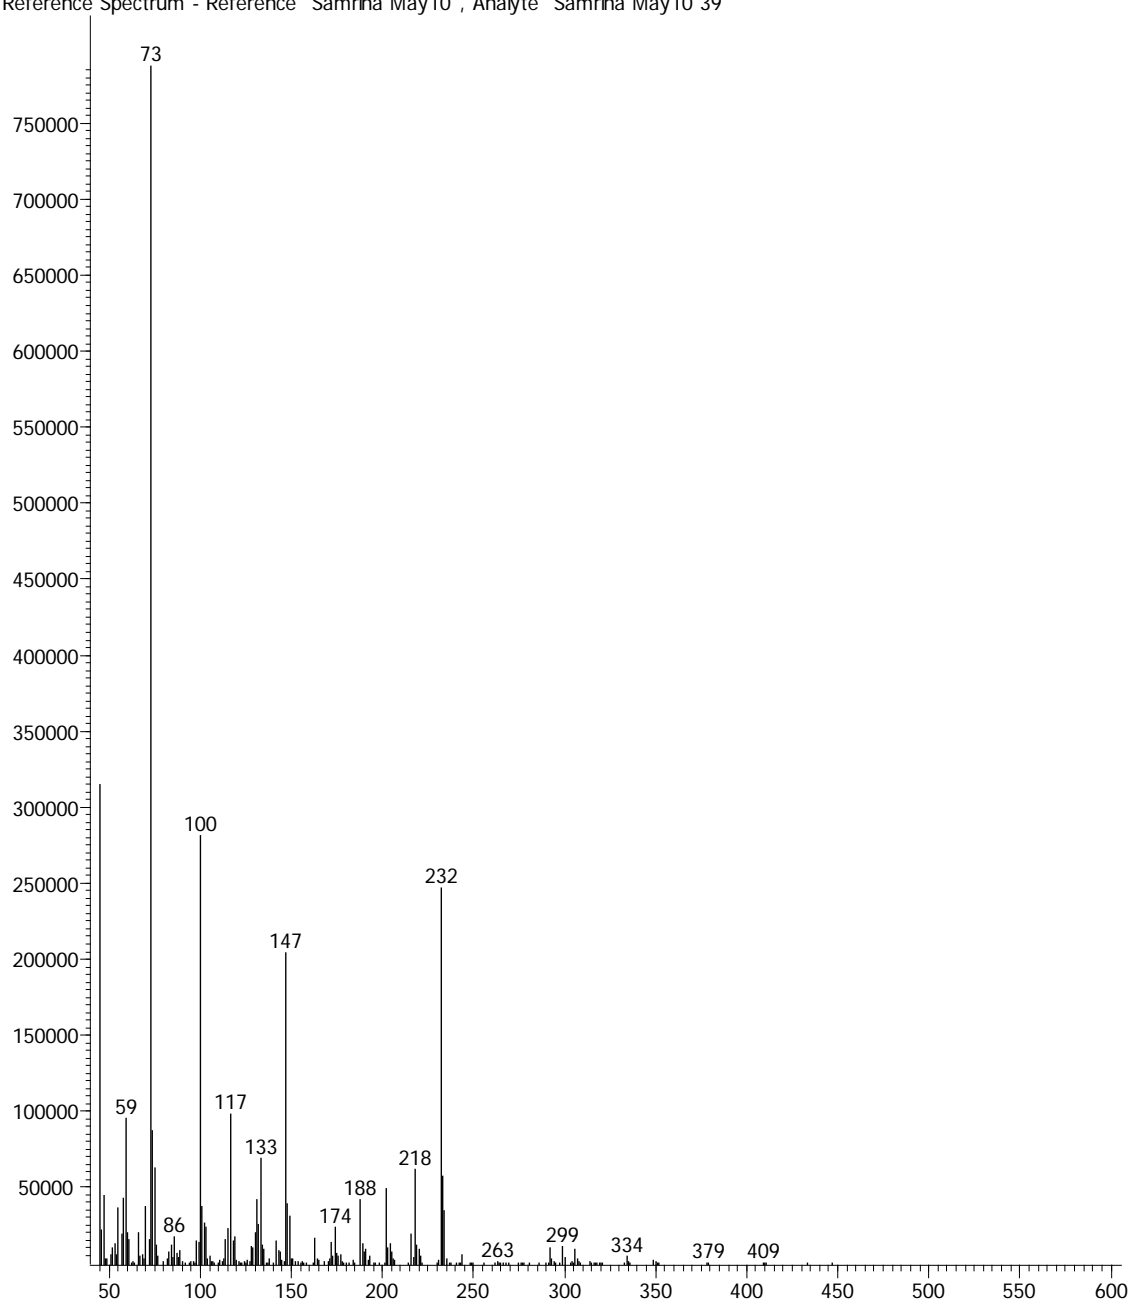

### 8 f) L-Cysteine MW 121.158

Reference Spectrum - Reference "Samrina May10", Analyte "Samrina May10 42"

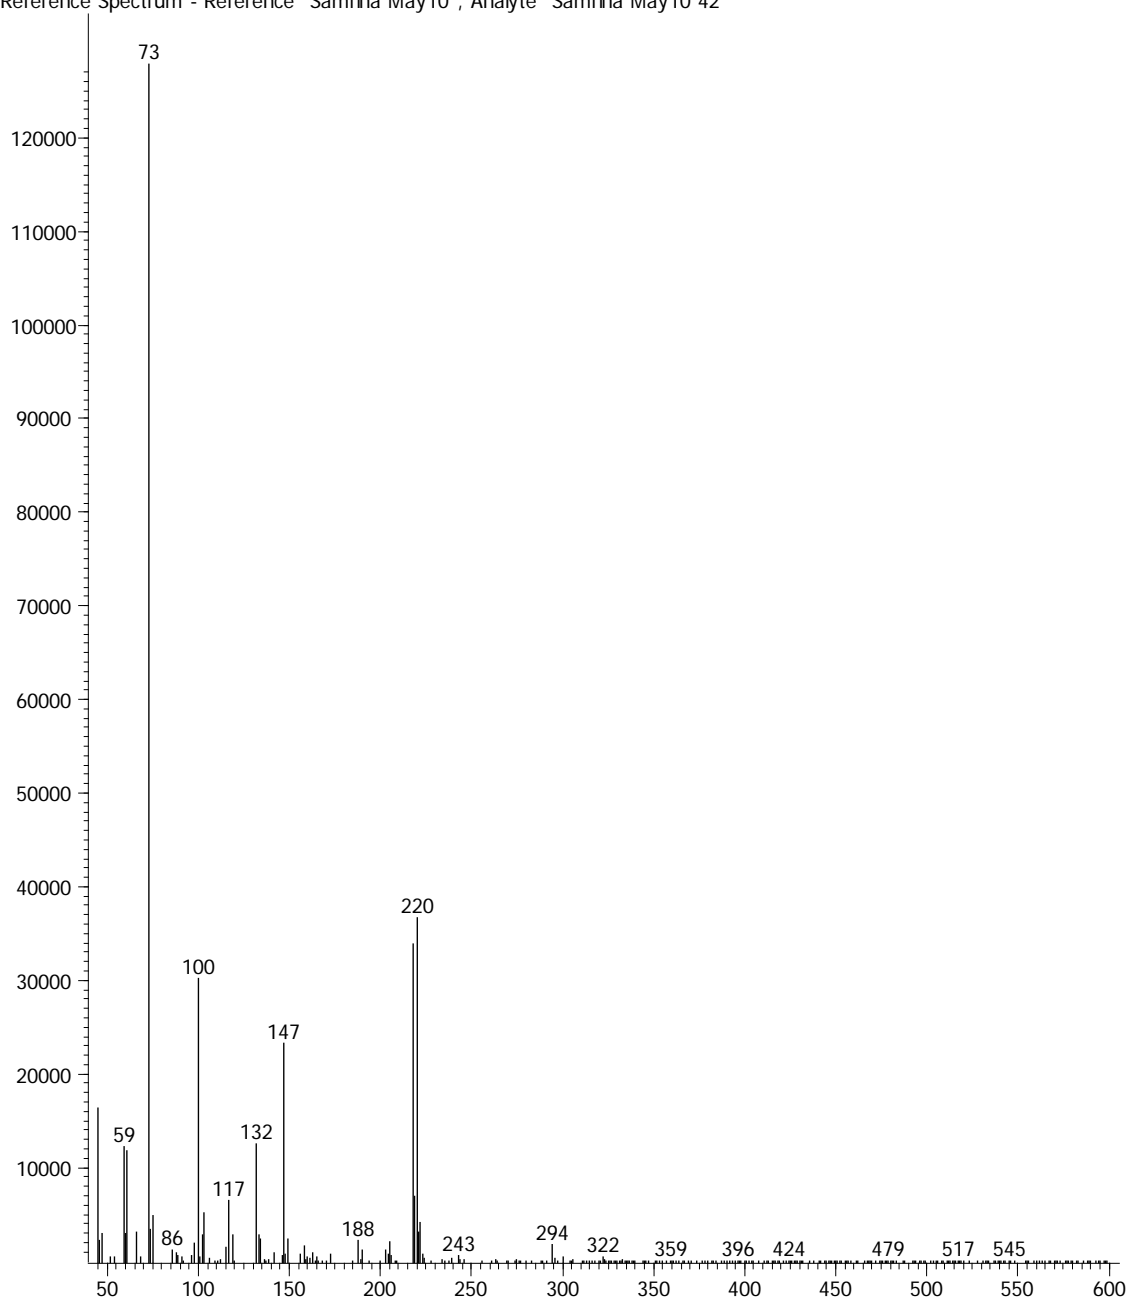

Supplement: c2mb25173f_2.pdf [file c2mb25173f_2.pdf]
